# Supplementary material
Source: publisher figshare collection journal article supplement (https://frontiersin.figshare.com/ndownloader/files/15365966)

**Ratio of stroke within one year before and after diagnosis of cancer: different cancers**

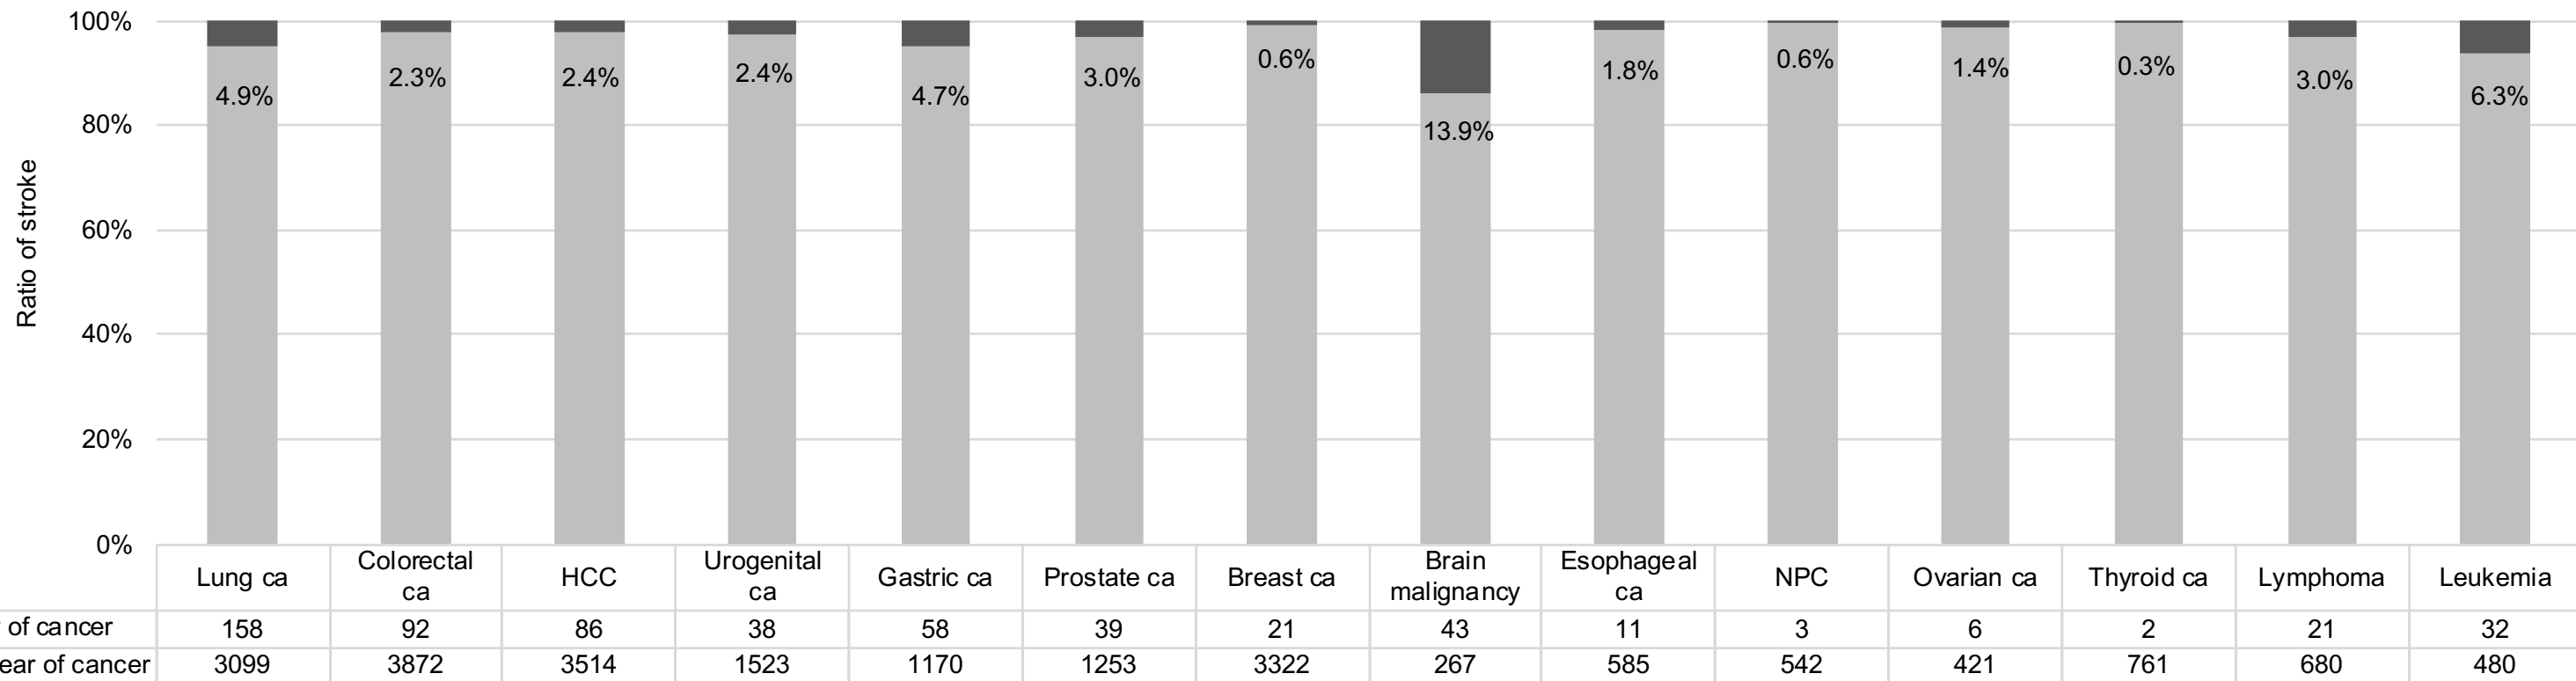

Supplement: Supplementary file [file 15365966]
